# Supplementary material for: Catalysis of surface dispersed Cu2+ species on t-ZrO2: square-planar Cu catalyzed cross-coupling of arylboronic acid and imidazole
Source: Royal Society of Chemistry journal article supplement (doi:10.1039/d3cy00024a), 2023-01-01

## Supporting Information

### Catalysis of surface dispersed Cu<sup>2+</sup> species on *t*-ZrO<sub>2</sub>: Square-planar Cu catalyzed cross-coupling of arylboronic acid and imidazole

Masaru Kondo,\*<sup>1</sup> Tatsuya Joutsuka,\*<sup>1,2</sup> Kakeru Fujiwara,<sup>3</sup> Tetsuo Honma,<sup>4</sup> Masahiko Nishijima,<sup>5</sup> Shohei Tada\*<sup>6</sup>

<sup>1</sup>*Department of Materials Science and Engineering, Graduate School of Science and Engineering, Ibaraki University, 4-12-1 Naka-narusawa, Hitachi-shi, Ibaraki 316-8511 Japan*

<sup>2</sup>*Frontier Research Center for Applied Atomic Sciences, Ibaraki University, Tokai, Ibaraki 319-1106, Japan*

<sup>3</sup>*Department of Chemistry and Chemical Engineering, Yamagata University, Yamagata 992-8510, Japan*

<sup>4</sup>*Japan Synchrotron Radiation Research Institute, Hyogo 679-5198, Japan*

<sup>5</sup>*Flexible 3D System Integration Lab, SANKEN, Osaka University, Mihogaoka, Ibaraki-shi, Osaka 567-0047, Japan*

<sup>6</sup>*Department of Applied Science and Engineering, School of Engineering, Hokkaido University, Kita 13, Nishi 8, Kita-ku, Sapporo, Hokkaido 060-8628, Japan*

Correspondence: [masaru.kondo.fg74@vc.ibaraki.ac.jp](mailto:masaru.kondo.fg74@vc.ibaraki.ac.jp)  
[tatsuya.joutsuka.joe@vc.ibaraki.ac.jp](mailto:tatsuya.joutsuka.joe@vc.ibaraki.ac.jp)  
[shohei.tada.st@eng.hokudai.ac.jp](mailto:shohei.tada.st@eng.hokudai.ac.jp)

#### CONTENTS:

|                                                        |       |
|--------------------------------------------------------|-------|
| <b>Characterization of compounds</b> .....             | SI-2  |
| <b>Characterization of catalysts</b> .....             | SI-5  |
| <b>Computational details of DFT calculations</b> ..... | SI-9  |
| <b>Control experiment</b> .....                        | SI-11 |
| <b>References</b> .....                                | SI-12 |
| <b><sup>1</sup>H-, <sup>13</sup>C NMR charts</b> ..... | SI-13 |

## Characterization of Compounds

$^1\text{H}$ -,  $^{13}\text{C}$ -NMR spectra were recorded with a Bruker AVANCE III ( $^1\text{H}$ -NMR 400 MHz,  $^{13}\text{C}$ -NMR 100 MHz).  $^1\text{H}$ -NMR spectra are reported as follows: chemical shift in ppm relative to the chemical shift of  $\text{CHCl}_3$  at 7.26 ppm, integration, multiplicities (s = singlet, d = doublet, t = triple, m = multiplet), and coupling constants (Hz).  $^{13}\text{C}$ -NMR spectra reported in ppm relative to the central line of triplet for  $\text{CDCl}_3$  at 77 ppm. Column chromatography on  $\text{SiO}_2$  was performed with Kanto Silica Gel 60 (40-100  $\mu\text{m}$ ). Commercially available organic and inorganic compounds were used without further purification.

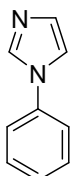

**3a**

**3a:** 21.8 mg, 76% yield;  $^1\text{H}$ -NMR (400 MHz,  $\text{CDCl}_3$ )  $\delta$  7.85 (s, 1H), 7.48-7.45 (m, 2H), 7.38-7.35 (m, 3H), 7.27-7.26 (m, 1H), 7.19 (s, 1H);  $^{13}\text{C}$ -NMR (100 MHz,  $\text{CDCl}_3$ )  $\delta$  137.2, 135.5, 130.1, 129.8, 127.5, 121.4, 118.2.

$^1\text{H}$  and  $^{13}\text{C}$  NMR charts were consistent with previously reported data.<sup>1</sup>

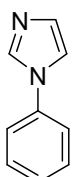

**3b**

**3b:** 29.3 mg, 93% yield;  $^1\text{H}$ -NMR (400 MHz,  $\text{CDCl}_3$ )  $\delta$  7.82 (s, 1H), 7.25-7.22 (m, 5H), 7.19 (s, 1H), 2.38 (s, 3H);  $^{13}\text{C}$ -NMR (100 MHz,  $\text{CDCl}_3$ )  $\delta$  137.4, 135.0, 130.3, 121.4, 118.55, 20.9 (two peaks were overlapped).

$^1\text{H}$  and  $^{13}\text{C}$  NMR charts were consistent with previously reported data.<sup>1</sup>

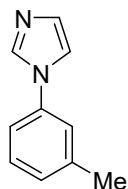

**3c**

**3c:** 31.2 mg, 99% yield;  $^1\text{H}$ -NMR (400 MHz,  $\text{CDCl}_3$ )  $\delta$  7.83 (s, 1H), 7.34 (t,  $J = 7.6$  Hz, 1H), 7.26 (d,  $J = 3.6$  Hz, 1H), 7.18-7.15 (m, 4H), 2.41 (s, 3H);  $^{13}\text{C}$ -NMR (100 MHz,  $\text{CDCl}_3$ )  $\delta$  140.0, 137.3, 135.5, 130.2, 129.6, 128.2, 122.1, 118.5, 118.2, 21.3

$^1\text{H}$  and  $^{13}\text{C}$  NMR charts were consistent with previously reported data.<sup>2</sup>

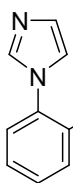

**3d**

**3d:** 24.0 mg, 76% yield;  $^1\text{H-NMR}$  (400 MHz,  $\text{CDCl}_3$ )  $\delta$  7.58 (s, 1H), 7.36-7.20 (m, 5H), 7.06 (s, 1H), 2.19 (s, 3H);  $^{13}\text{C-NMR}$  (100 MHz,  $\text{CDCl}_3$ )  $\delta$  137.4, 136.6, 133.8, 131.2, 129.3, 128.8, 126.8, 126.5, 120.4, 17.6

$^1\text{H}$  and  $^{13}\text{C}$  NMR charts were consistent with previously reported data.<sup>1</sup>

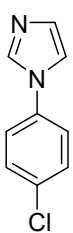

**3e**

**3e:** 25.2 mg, 71% yield;  $^1\text{H-NMR}$  (400 MHz,  $\text{CDCl}_3$ )  $\delta$  7.81 (s, 1H), 7.45 (d,  $J = 8.8$  Hz, 2H), 7.33 (d,  $J = 8.8$  Hz, 2H), 7.22 (m, 2H);  $^{13}\text{C-NMR}$  (100 MHz,  $\text{CDCl}_3$ )  $\delta$  135.9, 135.5, 130.7, 130.0, 122.7, 118.2

$^1\text{H}$  and  $^{13}\text{C}$  NMR charts were consistent with previously reported data.<sup>1</sup>

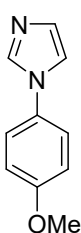

**3f**

**3f:** 26.8 mg, 77% yield;  $^1\text{H-NMR}$  (400 MHz,  $\text{CDCl}_3$ )  $\delta$  7.75 (s, 1H), 7.30 (d,  $J = 8.8$  Hz, 2H), 7.20-7.17 (m, 2H), 6.98 (d,  $J = 8.8$  Hz, 2H), 3.85 (s, 3H);  $^{13}\text{C-NMR}$  (100 MHz,  $\text{CDCl}_3$ )  $\delta$  158.9, 135.8, 130.7, 129.9, 123.2, 118.7, 114.9, 55.5

$^1\text{H}$  and  $^{13}\text{C}$  NMR charts were consistent with previously reported data.<sup>1</sup>

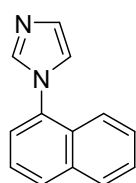

**3g**

**3g:** 29.8 mg, 77% yield;  $^1\text{H-NMR}$  (400 MHz,  $\text{CDCl}_3$ )  $\delta$  7.95 (d,  $J = 7.8$  Hz, 2H), 7.78 (s, 1H), 7.62-7.50 (m, 4H), 7.45 (dd,  $J = 7.2, 1.1$  Hz, 1H), 7.38-7.22 (m, 2H);  $^{13}\text{C-NMR}$  (100 MHz,  $\text{CDCl}_3$ )  $\delta$  134.1, 134.0, 129.6, 129.4, 129.2, 128.2, 127.5, 126.9, 125.1, 123.6, 122.2 (two peaks were overlapped).

$^1\text{H}$  and  $^{13}\text{C}$  NMR charts were consistent with previously reported data.<sup>2</sup>

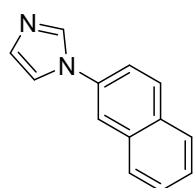

**3h**

**3h:** 31.5 mg, 81% yield;  $^1\text{H-NMR}$  (400 MHz,  $\text{CDCl}_3$ ) 7.97-7.94 (m, 2H), 7.89-7.86 (m, 2H), 7.80 (d,  $J = 2.2$  Hz, 1H), 7.58-7.50 (m, 3H), 7.39 (s, 1H), 7.26 (s, 1H);  $^{13}\text{C-NMR}$  (100 MHz,  $\text{CDCl}_3$ )  $\delta$  135.8, 134.7, 133.5, 132.1, 130.5, 130.0, 127.8, 127.7, 127.3, 126.5, 120.2, 119.0, 118.4

$^1\text{H}$  and  $^{13}\text{C}$  NMR charts were consistent with previously reported data.<sup>2</sup>

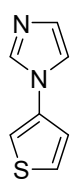 **3i**: 11.1 mg, 37% yield;  $^1\text{H}$ -NMR (400 MHz,  $\text{CDCl}_3$ )  $\delta$  7.81 (s, 1H), 7.43 (dd,  $J$  = 5.2, 3.2 Hz, 1H), 7.23 (s, 1H), 7.21-7.20 (m, 1H), 7.18-7.16 (m, 2H);  $^{13}\text{C}$ -NMR (100 MHz,  $\text{CDCl}_3$ )  $\delta$  136.3, 135.8, 130.0, 127.1, 121.4, 118.5, 113.2.  
 $^1\text{H}$  and  $^{13}\text{C}$  NMR charts were consistent with previously reported data.<sup>3</sup>

**3i**

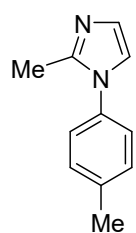 **3j**: 9.7 mg, 28% yield;  $^1\text{H}$ -NMR (400 MHz,  $\text{CDCl}_3$ )  $\delta$  7.27 (d,  $J$  = 8.0 Hz, 2H), 7.17 (d,  $J$  = 8.0 Hz, 2H), 7.01 (d,  $J$  = 1.2 Hz, 1H), 6.97 (d,  $J$  = 1.2 Hz, 1H), 2.42 (s, 3H), 2.34 (s, 3H);  $^{13}\text{C}$ -NMR (100 MHz,  $\text{CDCl}_3$ )  $\delta$  144.7, 138.1, 135.5, 130.0, 127.4, 125.3, 120.7, 21.0, 13.7

**3j**

$^1\text{H}$  and  $^{13}\text{C}$  NMR charts were consistent with previously reported data.<sup>4</sup>

## Characterization of catalysts

**X-ray diffraction (XRD).** The X-ray diffraction of the crystal structure was conducted using a Rigaku Miniflex diffractometer. A glass plate was utilized to hold the sample powder, which was then placed within the diffractometer. The X-ray source utilized was Cu K $\alpha$ , with an acceleration voltage of 40 kV and a current of 15 mA.

**X-ray fluorescence (XRF).** The determination of Cu loading in the catalyst was carried out via XRF analysis using PANalytical Epsilon 1 instrumentation. Prior to the measurements, the Cu-containing sample was mixed with an internal standard of 99.8% pure NiO (Aldrich). The mixing ratio of the catalyst to NiO was 50wt%. The acquired data was analyzed using the fundamental parameter method, employing Omnian software (PANalytical). Table S1 shows the lists of CuO loadings which were approximately 1 mmol g<sub>cat</sub><sup>-1</sup>.

**Table S1** Cu content of the prepared catalysts.

| Sample                             | Cu content [mmol g <sub>cat</sub> <sup>-1</sup> ] |
|------------------------------------|---------------------------------------------------|
| CuO/TiO <sub>2</sub>               | 1.0                                               |
| CuO/Al <sub>2</sub> O <sub>3</sub> | 1.2                                               |
| CuO/ <i>m</i> -ZrO <sub>2</sub>    | 1.1                                               |
| CuO/ <i>t</i> -ZrO <sub>2</sub>    | 1.1                                               |

**Temperature programmed reduction by H<sub>2</sub> (H<sub>2</sub>-TPR).** H<sub>2</sub>-TPR measurements were conducted by a MicrotracBEL BELCAT-II to evaluate the reducibility of the catalysts. Before the measurement, 40 mg of the sample was heated in an Ar gas flow (Ar) at 300 °C for 1 h. After cooling the sample to room temperature, changing the gas to 5% H<sub>2</sub>/Ar, and the signal of TCD became stable, the measurement was started. The heating rate was set to 5 °C min<sup>-1</sup>.

**Scanning transmission electron microscopy (STEM).** The particle morphology was investigated by an ultra-high resolution scanning transmission electron microscope (JEOL JEM-ARM200F) equipped with a spherical aberration corrector for a STEM probe. The sample was dispersed in ethanol (Wako, purity > 99.5%) and the suspension was dropped onto a carbon-coated molybdenum grid (Ohken shoji Co., NP-M15) to deposit the particles on the microgrid film of the grid. Elemental maps of Cu and Zr were recorded using an energy dispersive X-ray (EDX) detector.

***X-ray absorption spectroscopy (XAS).*** Using X-ray absorption spectroscopy (XAS) at the BL14B2 beamline at SPring-8, the Cu K-edge XANES (X-ray absorption near edge structure) and EXAFS (extended X-ray absorption fine structure) was measured. XAS data were collected in the quick mode. The Si (3 1 1) monochromator continuously moved from 25.415° to 22.05° over 313 s for the Cu K-edge. Spectra were collected in the transmission mode using ion chambers filled with an Ar/N<sub>2</sub> mixture on pressed pellets of the samples. The samples and BN were mixed using a mortar and pestle and pressed into a thin disk using a 10 mm die set. Spectra were corrected and normalized using Athena and Artemis.<sup>5</sup> The radial structure function (RSF) was obtained by Fourier transformation of the  $k^3$ -weighted experimental  $\chi(k)$  function ( $k = 30$ -110 nm<sup>-1</sup>) into the R space. Theoretical phase-shift and amplitude functions were calculated with the FEFF6 program.

**Table S2** Parameters calculated by fitting the EXAFS signals of CuO and the prepared Cu-based catalysts shown in **Fig. 2** and **S1** †

| Sample                                   | Shell | $S_0^2$     | CN      | $R / \text{\AA}$ | $\sigma^2 / \text{\AA}^2$ | $\Delta E_0 / \text{eV}$ | R factor |
|------------------------------------------|-------|-------------|---------|------------------|---------------------------|--------------------------|----------|
| CuO                                      | Cu-O  | 0.810±0.112 | 4 *     | 1.96±0.01        | 0.004±0.001               | 3.48±1.76                | 0.007    |
|                                          | Cu-O  |             | 2 *     | 2.76±0.08        | 0.012±0.015               |                          |          |
|                                          | Cu-Cu |             | 4 *     | 2.91±0.02        | 0.006±0.001               |                          |          |
|                                          | Cu-Cu |             | 4 *     | 3.10±0.01        | 0.006±0.002               |                          |          |
| CuO/Al <sub>2</sub> O <sub>3</sub>       | Cu-O  | 0.780±0.097 | 3.9±0.5 | 1.95±0.01        | 0.005±0.001               | 2.40±1.61                | 0.019    |
|                                          | Cu-O  |             | 1.9±0.2 | 2.89±0.04        | 0.009±0.005               |                          |          |
| CuO/TiO <sub>2</sub>                     | Cu-O  | 0.812±0.108 | 4.0±0.5 | 1.95±0.01        | 0.004±0.001               | 3.04±1.80                | 0.008    |
|                                          | Cu-O  |             | 2.0±0.3 | 2.73±0.11        | 0.017±0.019               |                          |          |
|                                          | Cu-Cu |             | 4.0±0.5 | 2.90±0.02        | 0.007±0.002               |                          |          |
|                                          | Cu-Cu |             | 4.0±0.5 | 3.08±0.03        | 0.008±0.002               |                          |          |
| CuO/m-ZrO <sub>2</sub>                   | Cu-O  | 0.746±0.123 | 4.0±0.5 | 1.95±0.01        | 0.003±0.002               | 3.23±2.29                | 0.012    |
|                                          | Cu-O  |             | 2.0±0.3 | 2.71±0.15        | 0.018±0.024               |                          |          |
|                                          | Cu-Cu |             | 4.0±0.5 | 2.90±0.03        | 0.007±0.003               |                          |          |
|                                          | Cu-Cu |             | 4.0±0.5 | 3.08±0.03        | 0.009±0.003               |                          |          |
| CuO/t-ZrO <sub>2</sub>                   | Cu-O  | 0.793±0.084 | 3.9±0.4 | 1.95±0.01        | 0.006±0.001               | 1.60±1.44                | 0.019    |
| CuO/t-ZrO <sub>2</sub><br>After reaction | Cu-O  | 0.763±0.080 | 3.8±0.4 | 1.95±0.01        | 0.006±0.001               | 0.66±1.38                | 0.018    |

† Notations:  $S_0^2$ , intrinsic loss factor;  $R$ , distance; CN, coordination number;  $\sigma$ , Debye-Waller factor;  $\Delta E_0$ , increase in the threshold energy. Confidence intervals = 68%. \* Fixed to the values.

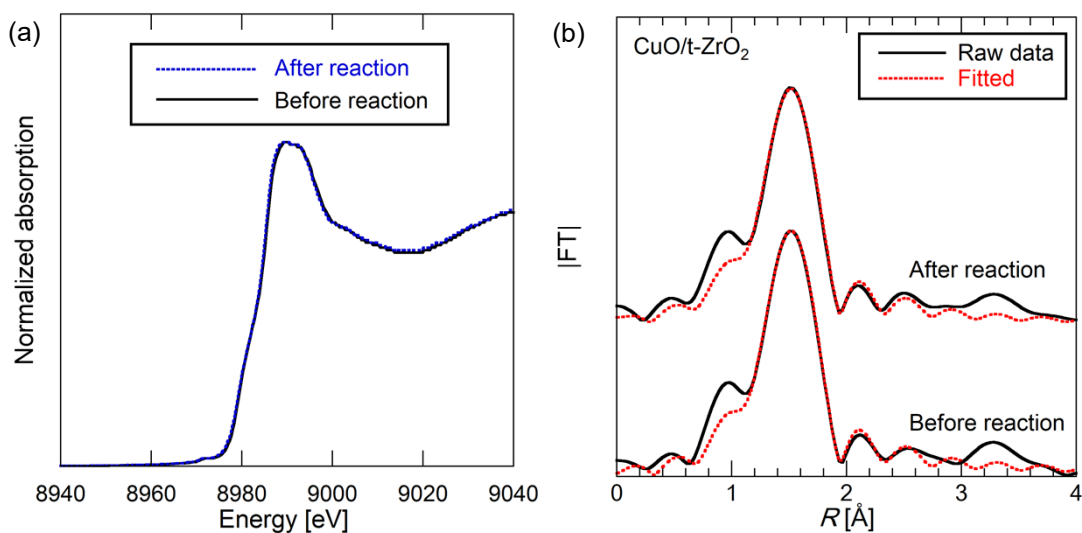

**Fig. S1** Cu-K edge XANES spectra for (a) CuO/*t*-ZrO<sub>2</sub> before and after reaction. (b) Fourier transforms of  $k^3$ -weighted EXAFS oscillations measured at room temperature near the Cu K-edge of CuO/*t*-ZrO<sub>2</sub> before and after reaction.  $k$  range: 30-110 nm<sup>-1</sup>.  $R$  range: 1.0-3.4 Å.

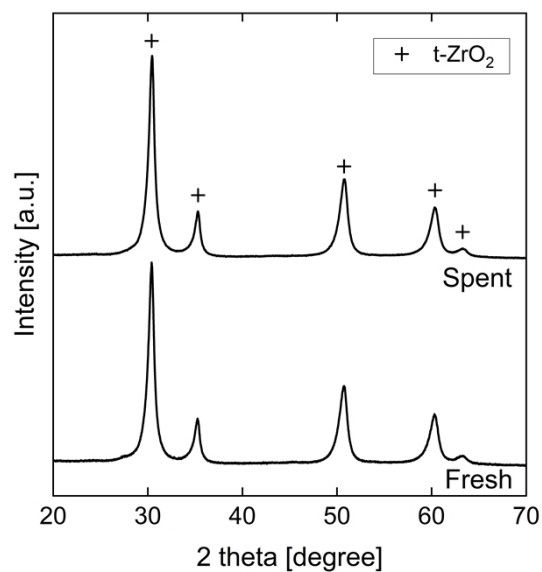

**Fig. S2** XRD patterns of fresh and spent CuO/*t*-ZrO<sub>2</sub>.



### Computational details of DFT calculations

The CuO/*t*-ZrO<sub>2</sub> surface was prepared by starting from the *t*-ZrO<sub>2</sub> surface (Zr<sub>96</sub>O<sub>192</sub>) shown in **Fig. S3a**. Two Cu atoms were replaced with two surface Zr atoms, resulting in Zr<sub>94</sub>Cu<sub>2</sub>O<sub>192</sub> (**Fig. S3b**). The two Zr atoms are in the next-nearest neighbor positions with the Cu–Cu distance of 6.19 Å as observed in Fourier transforms of the *k*<sup>3</sup>-weighted EXAFS oscillations in **Fig. 3b**, and are labeled by Zr<sub>S</sub> and Zr<sub>W</sub> as shown in **Fig. S3b**, because the two species represent the strong and weak Lewis sites, respectively.<sup>6</sup> After geometry optimization of Zr<sub>94</sub>Cu<sub>2</sub>O<sub>192</sub>, Cu<sub>S</sub> and Cu<sub>W</sub> atoms that were respectively substituted for the Zr<sub>S</sub> and Zr<sub>W</sub> atoms became 4-fold and 5-fold coordinated. To make an oxygen vacancy at the surface, we removed one O atom among 32 O atoms in the top layer and the geometry was optimized. We performed 32 geometry optimizations and chose the most stable structure with the lowest energy for Zr<sub>94</sub>Cu<sub>2</sub>O<sub>191</sub> (**Fig. S3c**). Here, the O vacancy was made for the O atom bonded to the Cu atom with 4-fold coordination. The same computations followed and resulted in Zr<sub>94</sub>Cu<sub>2</sub>O<sub>190</sub> (**Fig. S3d**) and Zr<sub>94</sub>Cu<sub>2</sub>O<sub>189</sub> (**Fig. S3e**). The surfaces shown in **Figs. S3b, S3c, S3d, and S3e** correspond to Cu<sup>4+</sup>, Cu<sup>3+</sup>, Cu<sup>2+</sup>, and Cu<sup>+</sup>, respectively.<sup>7</sup> In the calculation of adsorption energies, Zr<sub>94</sub>Cu<sub>2</sub>O<sub>190</sub> (**Fig. S3c**) was employed.

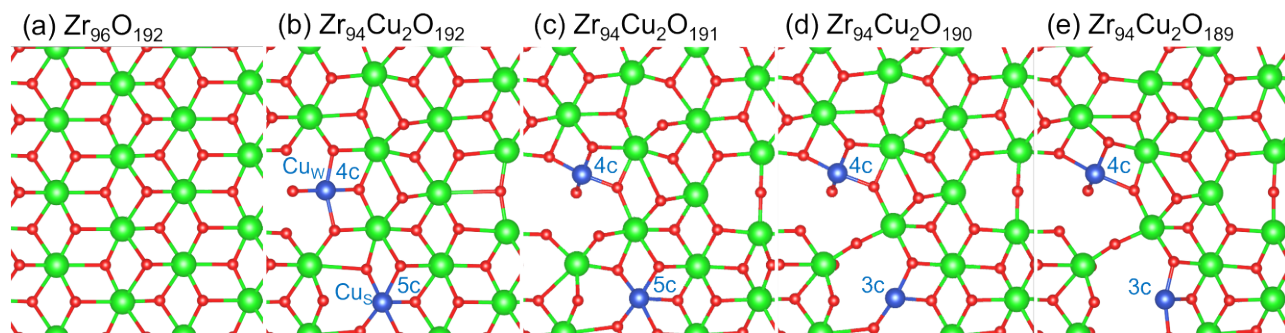

**Fig. S3** Top views of (a) *t*-ZrO<sub>2</sub> (101) surface and the Cu-substituted surfaces with (b) zero, (c) one, (d) two, and (e) three oxygen vacancies. The labels of Cu (weak Lewis site, W; strong Lewis site, S) and coordination number (three-fold coordination, 3c; four-fold coordination, 4c; five-fold coordination, 5c) are also shown. Only the top layer is shown for clarity.

Using the calculated energies for the surfaces shown in **Figs. S3b–e**, we estimated the free energy difference of formation from the Cu<sup>4+</sup> reference state given by previous reports.<sup>7,8</sup>

$$\Delta G = G(\text{Cu}^{4-n}) - G(\text{Cu}^{4+}) + n\mu_{\text{O}}$$

Here,  $G(\text{Cu}^m)$  denotes the free energy for the Cu<sup>*m*</sup> state. The entropic contributions are neglected in this study and approximated by the energies by DFT calculations for the surfaces shown in **Fig. S4**. The chemical potential of oxygen at a given temperature *T* and pressure *p* is defined<sup>7,8</sup>

$$\mu_{\text{O}} = \mu_{\text{O}}(T, p^{\circ}) + \frac{k_{\text{B}}T}{2} \ln \left( \frac{p}{p^{\circ}} \right),$$

where  $k_{\text{B}}$  is the Boltzmann constant and  $p^{\circ}$  is the standard pressure of oxygen ( $p^{\circ} = 1$  atm). The

energy of oxygen calculated by DFT ( $E_{O_2/2}$ ) was taken as a zero-reference state for  $\mu_O$ . Since the reaction underwent at 50 °C in our experiment, we approximately assumed  $\mu_O(T, p^0) = -0.27$  eV (300 K) for the chemical potential of oxygen.<sup>8</sup> **Fig. S4** shows the phase diagram of solid solution by plotting the free energy difference of formation as a function of chemical potential of oxygen. In the O-rich limit (high pressure of oxygen and high  $\mu_O$ ), the energy of  $\text{Cu}^{3+}$  is lower and the  $\text{Cu}^{3+}$  state is preferred. On the other hand, the  $\text{Cu}^{2+}$  state becomes more stable toward the O-poor limit (low  $\mu_O$ ). This indicates that  $\text{Cu}^{2+}$  and  $\text{Cu}^{3+}$  species are present at the  $\text{CuO}/t\text{-ZrO}_2$  surface under O-rich conditions, agreeing with the proposed reaction mechanism in **Fig. 10**. Moreover, these results are consistent with the reduced catalytic reactivity observed in the reaction test (**Table 1**). Notably, at the calcination temperature of the catalyst, the formation energies shifted to the left side in **Fig. S4**, with the  $\text{Cu}^{2+}$  species being the more predominant as observed in the  $\text{H}_2$ -TPR results. In addition, when  $\text{Cu}^{2+}$  was oxidized to  $\text{Cu}^{3+}$ , the atomic charges of the O atoms bonded with Cu atoms decrease from  $-0.45$  to  $-0.50$  on average. The more negatively charged O atoms around the  $\text{Cu}^{2+}$  cations may be more reducible as measured in the  $\text{H}_2$ -TPR experiment, and such tendency was also observed for the other Cu-doped oxides.<sup>9</sup>

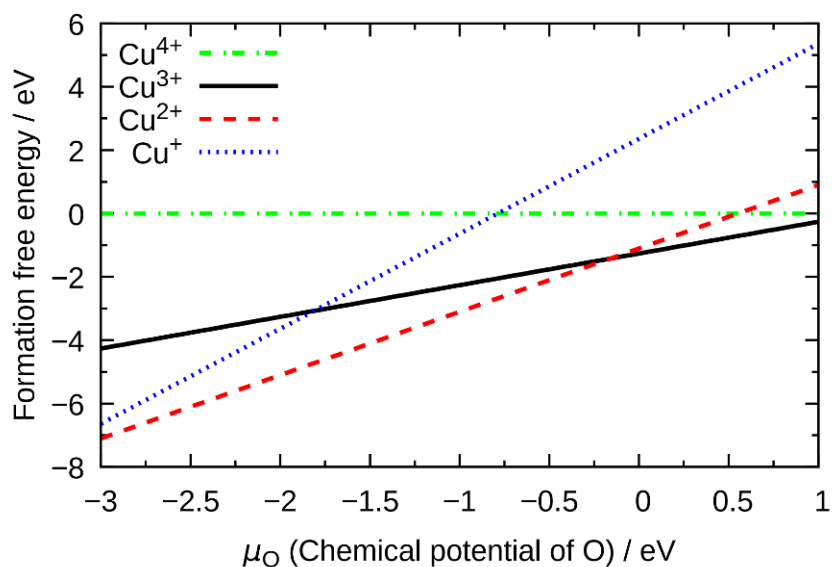

**Fig. S4** Formation free energy of the  $\text{CuO}/t\text{-ZrO}_2$  surfaces as a function of the chemical potential of O atom for  $\text{Cu}^{4+}$ ,  $\text{Cu}^{3+}$ ,  $\text{Cu}^{2+}$ , and  $\text{Cu}^+$  oxidation states at the reaction temperature.

## Control experiment

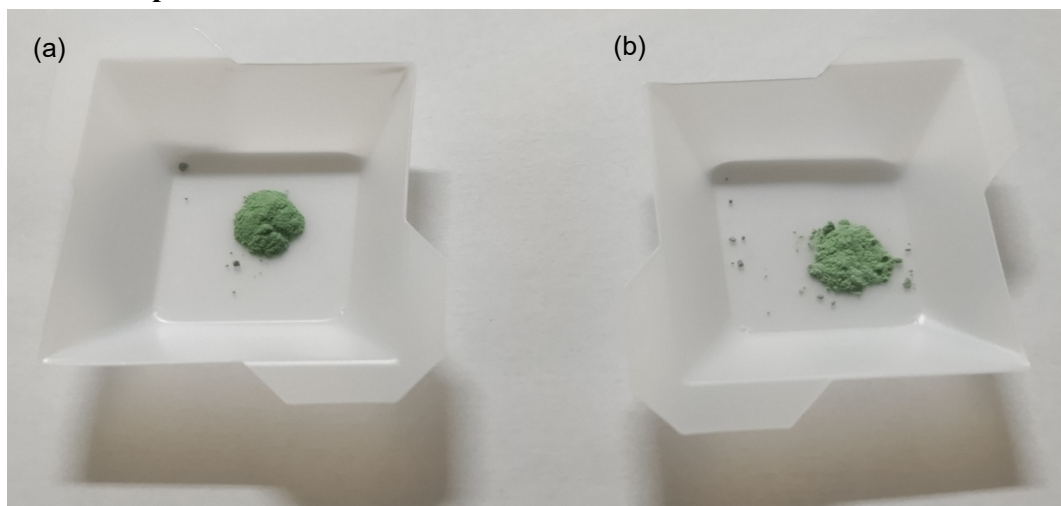

**Fig. S5** Colors of  $\text{CuO}/t\text{-ZrO}_2$  (a) before MeOH was added, (b) after stirring in MeOH for 8 h at 50 °C.

## References

1. K. Inamoto, K. Nozawa, J. Kadokawa and Y. Kondo, *Tetrahedron* 2012, **68**, 7794.
2. H. X. Li, W. Zhao, H. Y. Li, Z. L. Xu, W. X. Wang and J. P. Lang, *Chem. Commun.*, 2013, **49**, 4259.
3. Y. Wang, Y. Zhang, B. Yang, A. Zhang and Q. Yao, *Org. Biomol. Chem.*, 2015, **13**, 4101
4. B. Ravel and M. Newville, *J. Synchrotron Radiat.*, 2005, **12**, 537.
5. S. Tada, N. Ochiai, H. Kinoshita, M. Yoshida, N. Shimada, T. Joutsuka, M. Nishijima, T. Honma, N. Yamauchi, Y. Kobayashi, et al. *ACS Catalysis*, 2022, **12**, 7748.
6. (a) F. Haase and J. Sauer, *J. Am. Chem. Soc.*, 1998, **120**, 13503; (b) M. Delarmelina, G. Deshmukh, A. Goguet, C. R. A. Catlow and H. Manyar, *J. Phys. Chem. C*, 2021, **125**, 27578.
7. J. S. Elias, N. Artrith, M. Bugnet, L. Giordano, G. A. Botton, A. M. Kolpak and Y. Shao-Horn, *ACS Catal.*, 2016, **6**, 1675.
8. K. Reuter and M. Scheffler, *M. Phys. Rev. B*, 2001, **65**, 035406.
9. T. Joutsuka, R. Hamamura, K. Fujiwara, T. Honma, M. Nishijima and S. Tada, *Int. J. Hydrog. Energy*, 2022, **47**, 21369.

## NMR Charts

$^1\text{H-NMR}$  (400 MHz,  $\text{CDCl}_3$ ) chart of **3a**

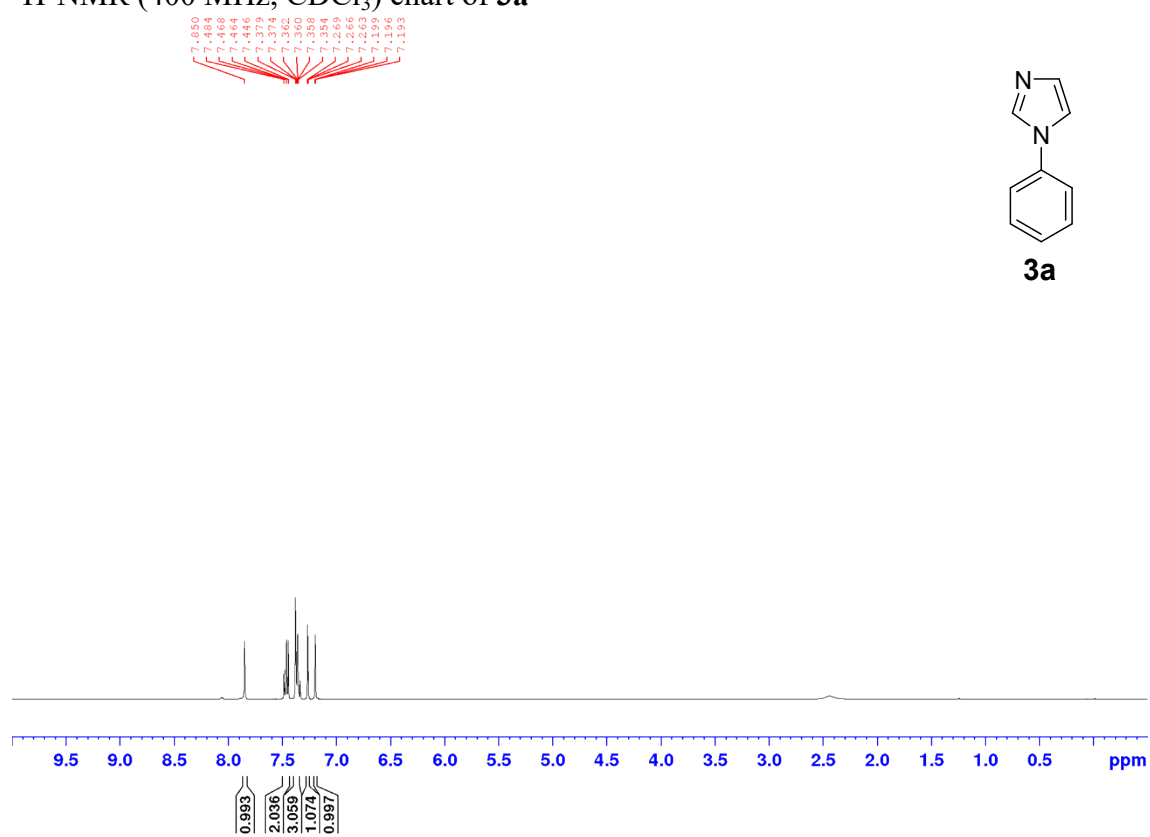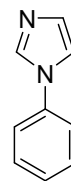

**3a**

$^{13}\text{C-NMR}$  (100 MHz,  $\text{CDCl}_3$ ) chart of **3a**

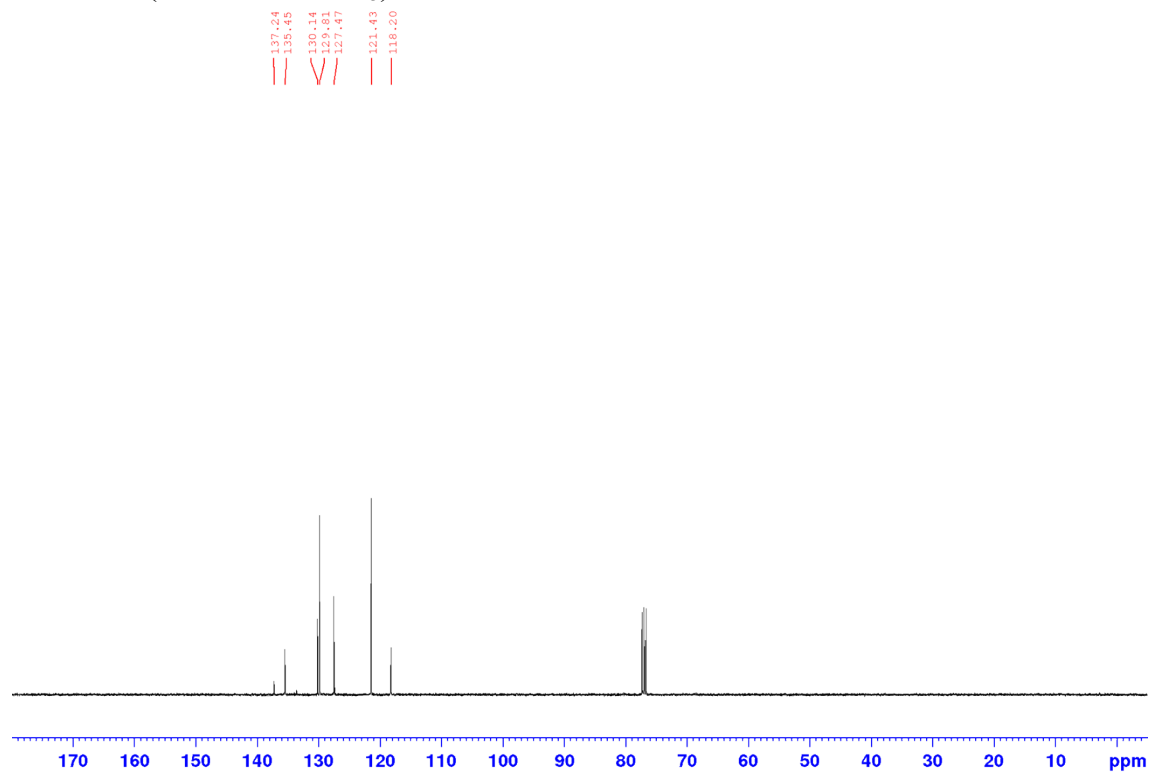

<sup>1</sup>H-NMR (400 MHz, CDCl<sub>3</sub>) chart of **3b**

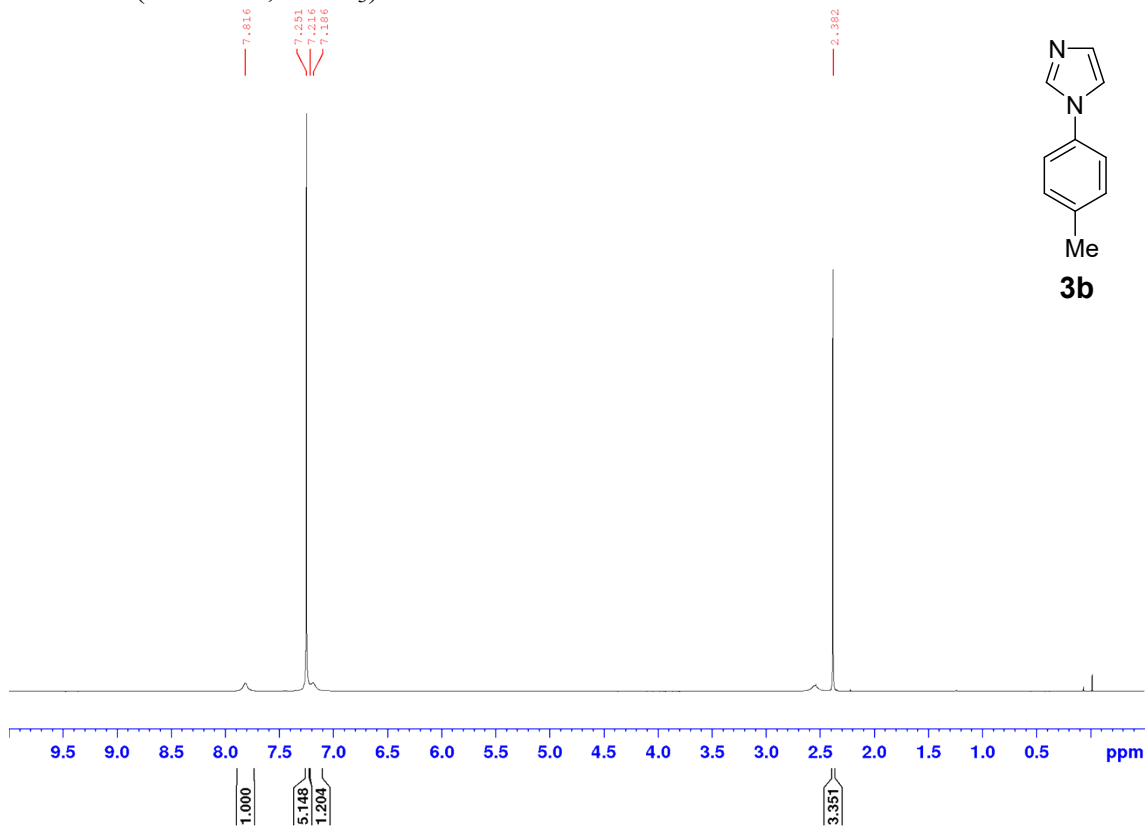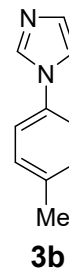

<sup>13</sup>C-NMR (100 MHz, CDCl<sub>3</sub>) chart of **3b**

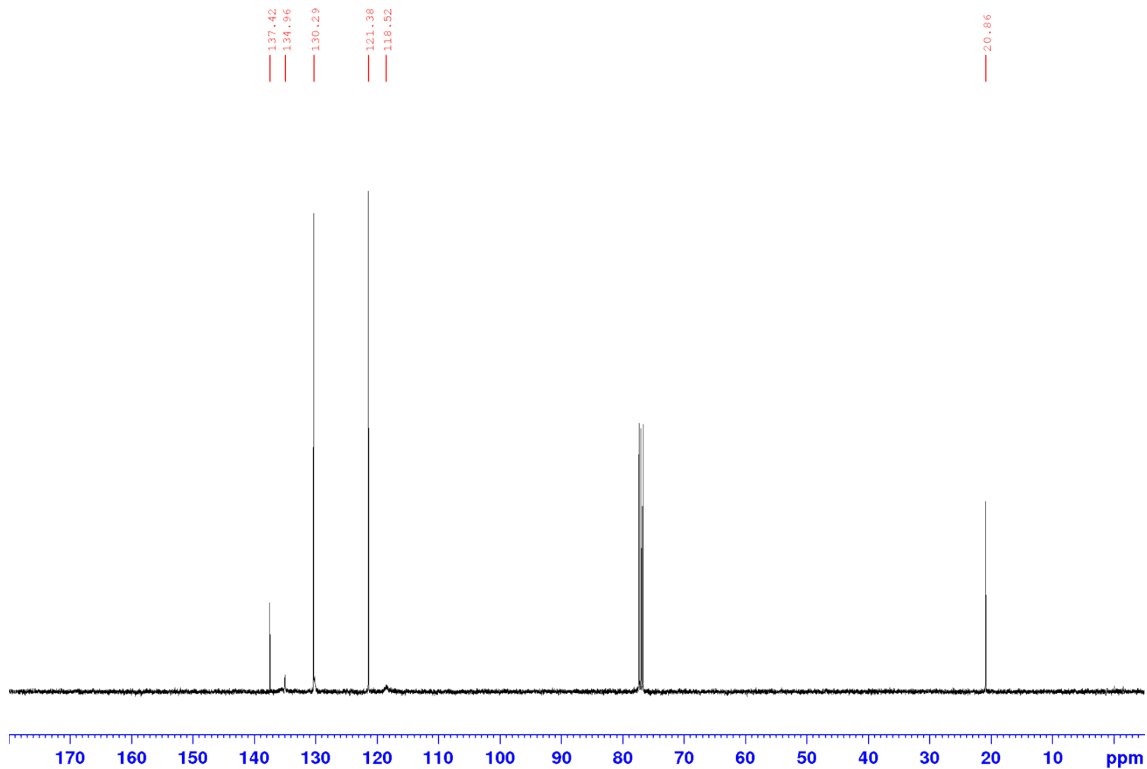

<sup>1</sup>H-NMR (400 MHz, CDCl<sub>3</sub>) chart of **3c**

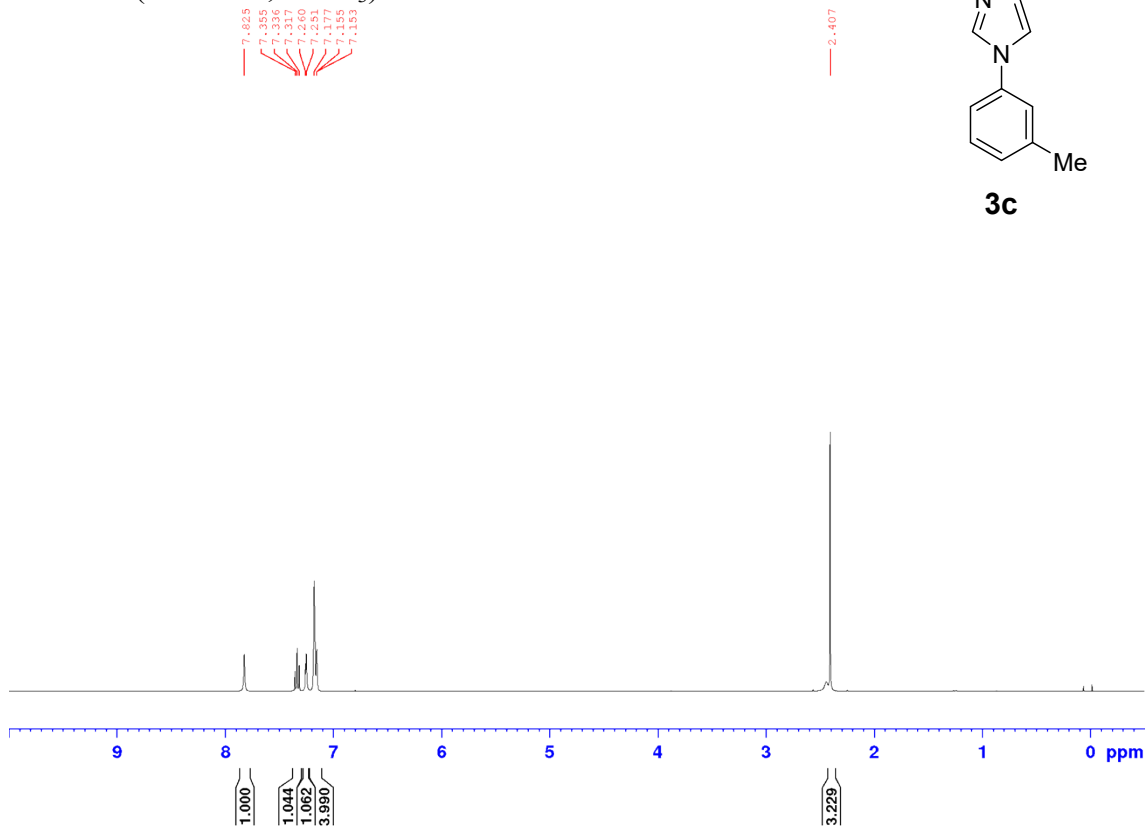

<sup>13</sup>C-NMR (100 MHz, CDCl<sub>3</sub>) chart of **3c**

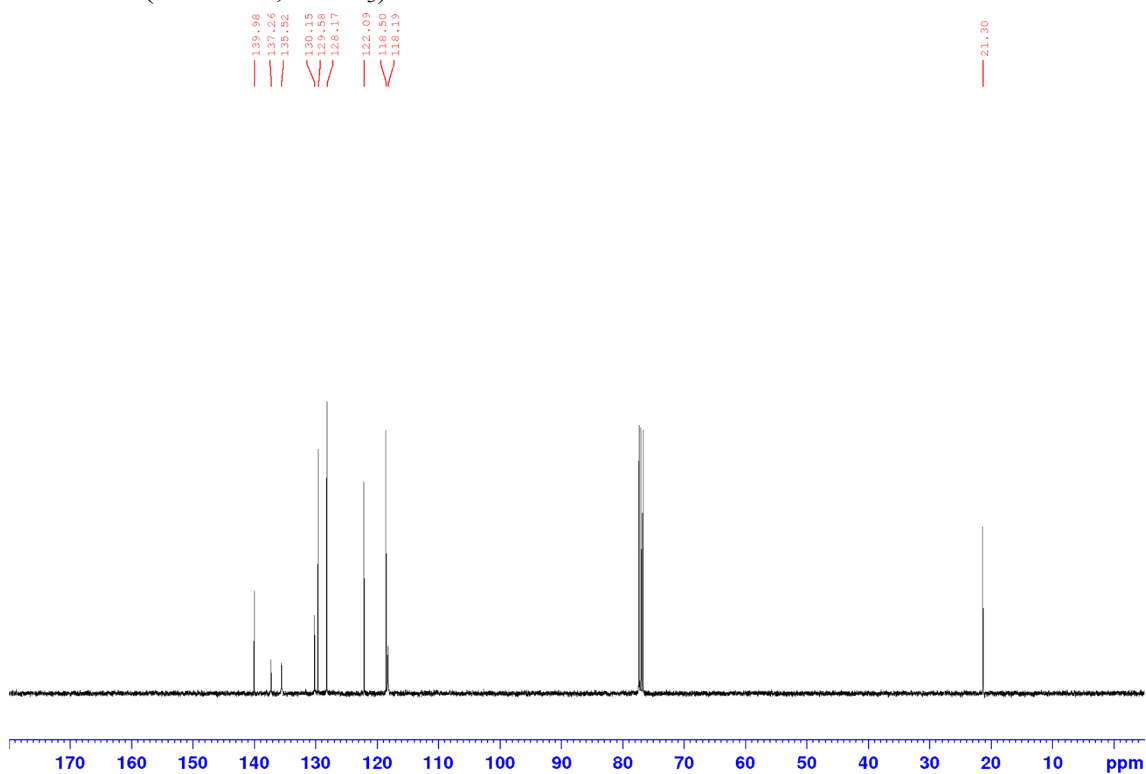

<sup>1</sup>H-NMR (400 MHz, CDCl<sub>3</sub>) chart of **3d**

7.458  
7.456  
7.396  
7.394  
7.340  
7.337  
7.306  
7.294  
7.283  
7.288  
7.275  
7.271  
7.228  
7.209  
7.204  
7.188

2.185

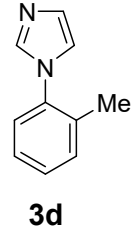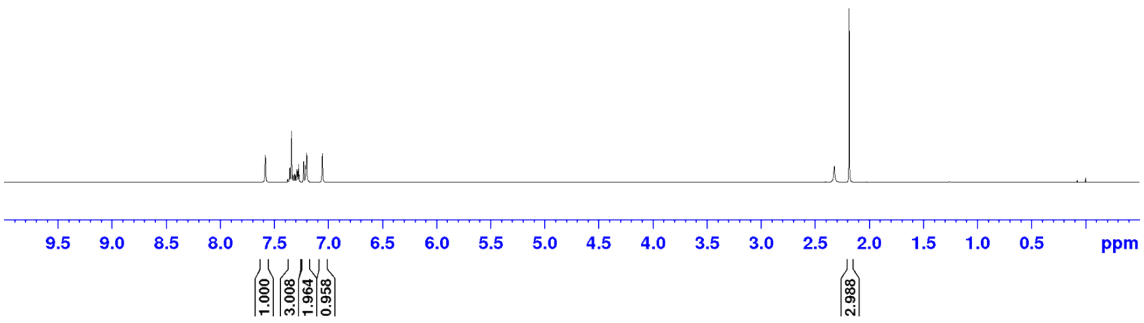

<sup>13</sup>C-NMR (100 MHz, CDCl<sub>3</sub>) chart of **3d**

137.44  
136.59  
131.83  
129.26  
128.75  
126.49  
120.44

17.55

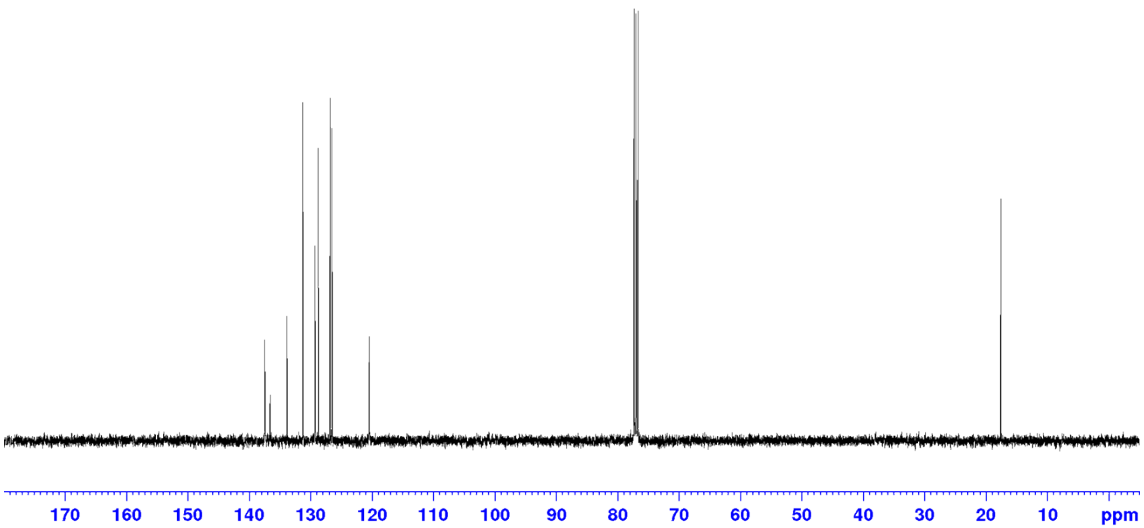



<sup>1</sup>H-NMR (400 MHz, CDCl<sub>3</sub>) chart of **3e**

7.4813  
7.459  
7.437  
7.336  
7.318  
7.298

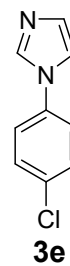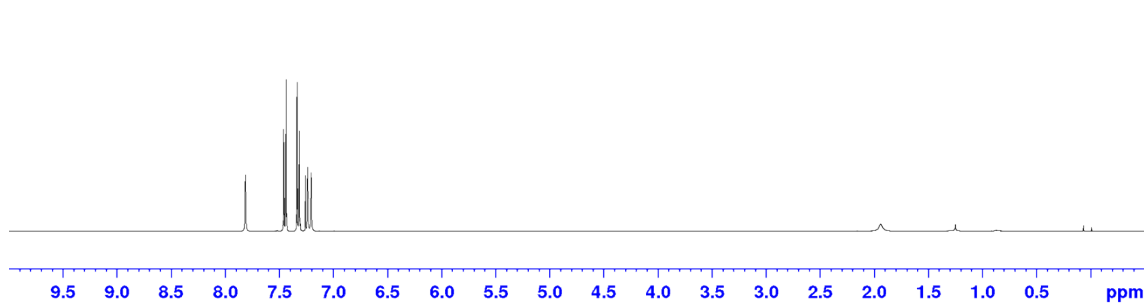

<sup>13</sup>C-NMR (100 MHz, CDCl<sub>3</sub>) chart of **3e**

135.82  
135.54  
133.23  
130.74  
130.02  
122.71  
118.16

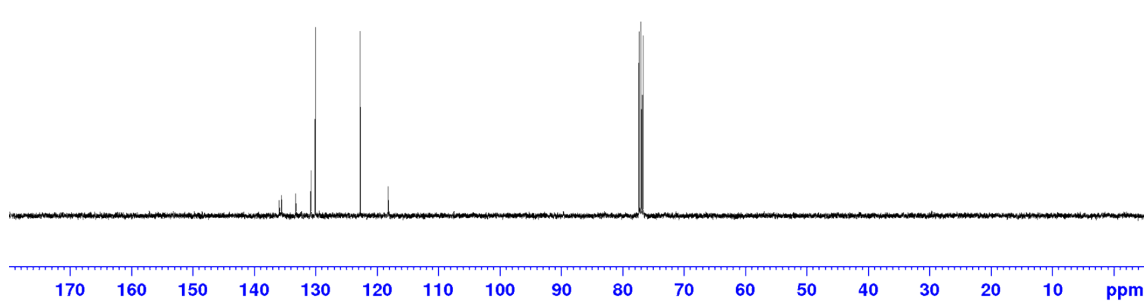

<sup>1</sup>H-NMR (400 MHz, CDCl<sub>3</sub>) chart of **3f**

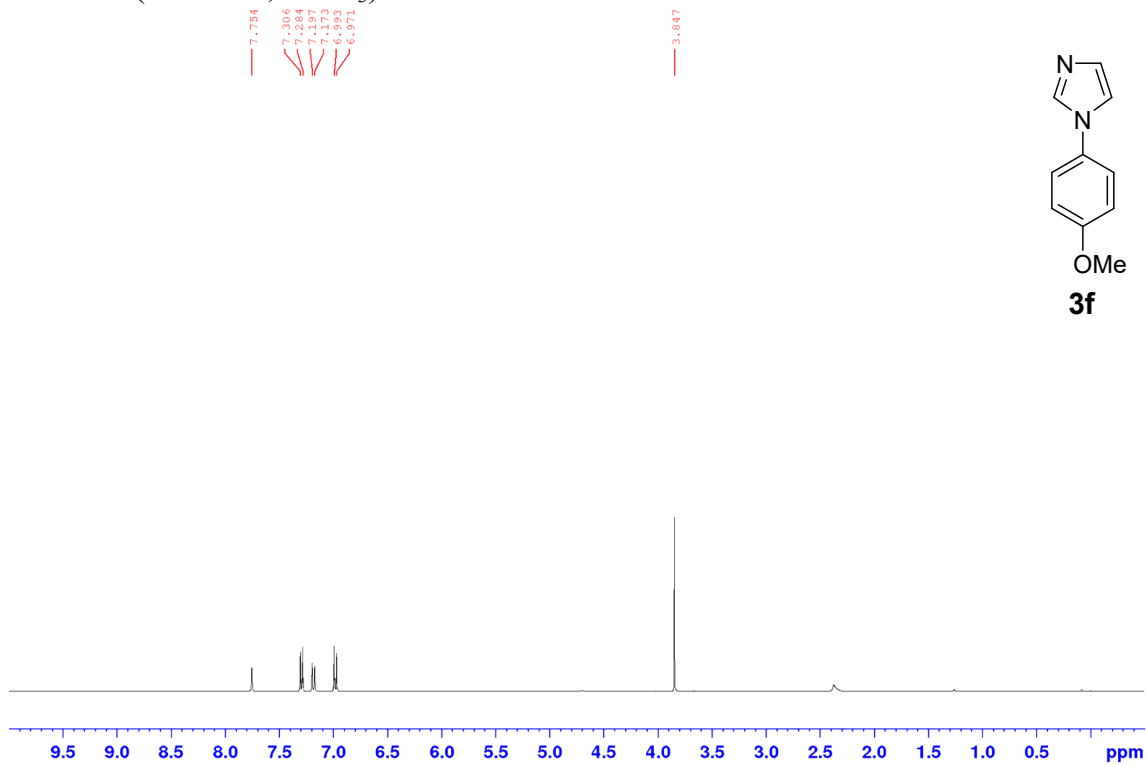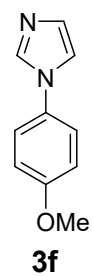

<sup>13</sup>C-NMR (100 MHz, CDCl<sub>3</sub>) chart of **3f**

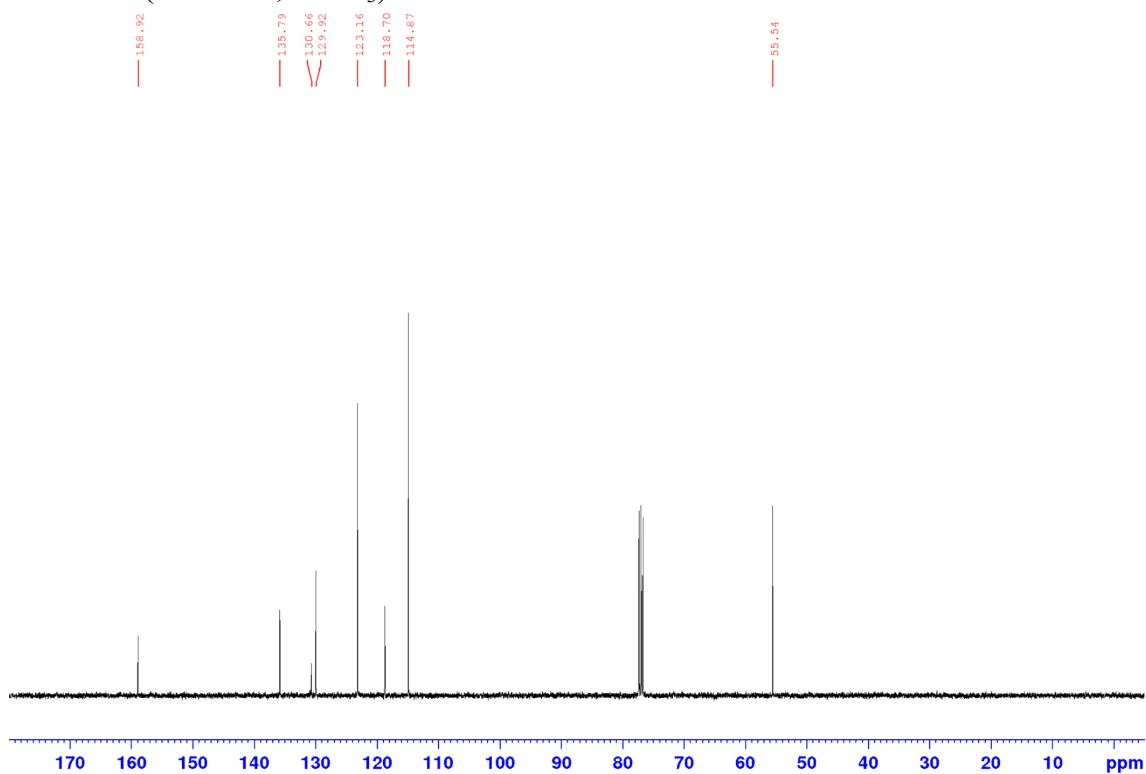

<sup>1</sup>H-NMR (400 MHz, CDCl<sub>3</sub>) chart of **3g**

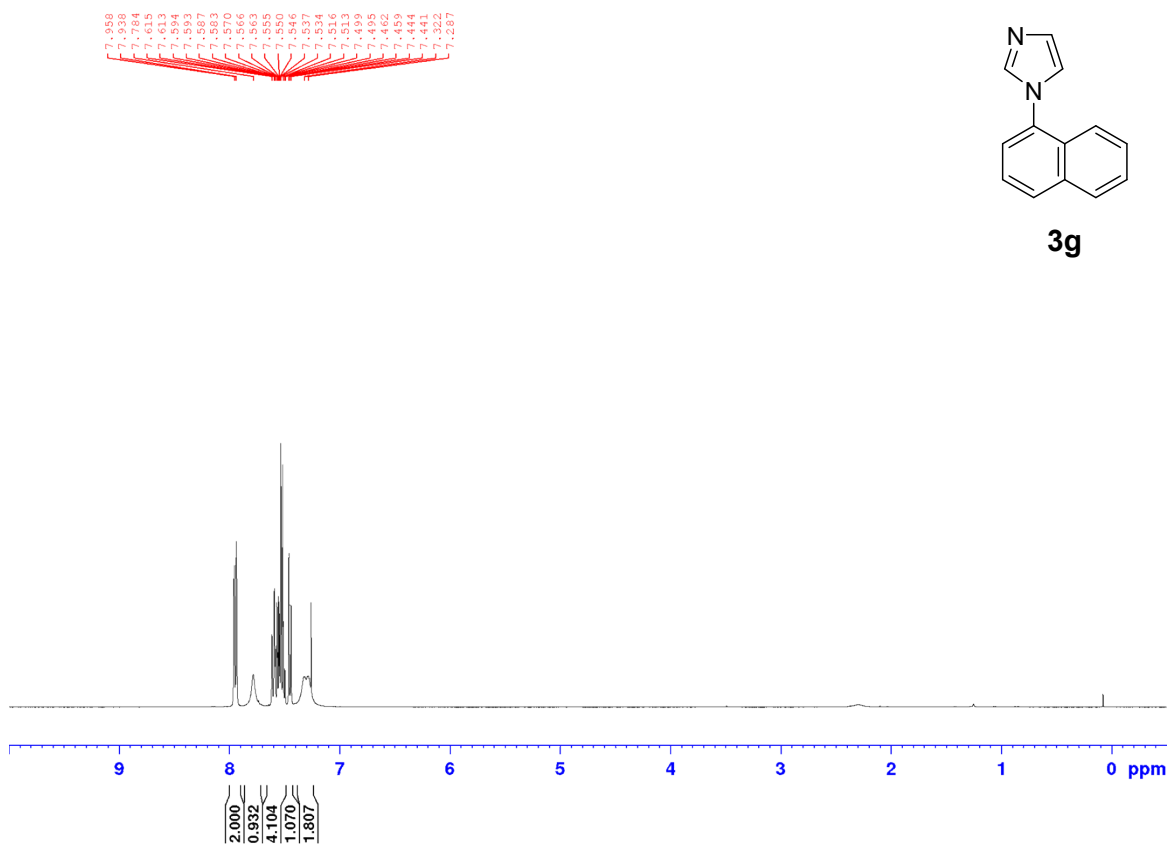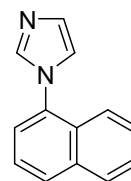

**3g**

<sup>13</sup>C-NMR (100 MHz, CDCl<sub>3</sub>) chart of **3g**

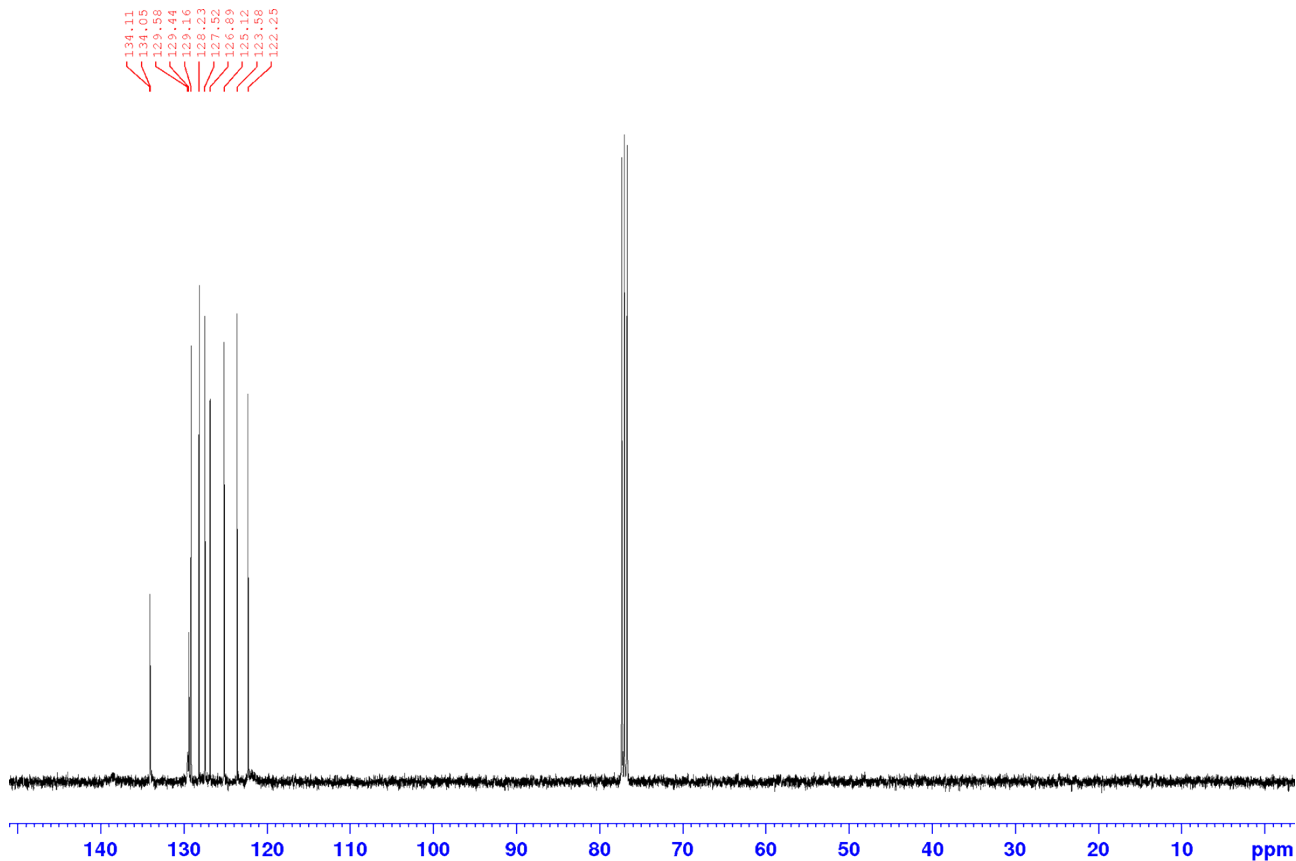

<sup>1</sup>H-NMR (400 MHz, CDCl<sub>3</sub>) chart of **3h**

7.970  
7.957  
7.935  
7.924  
7.874  
7.856  
7.807  
7.801  
7.582  
7.579  
7.562  
7.545  
7.541  
7.527  
7.521  
7.505  
7.499  
7.394  
7.259

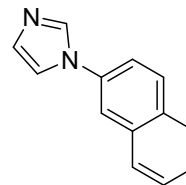

**3h**

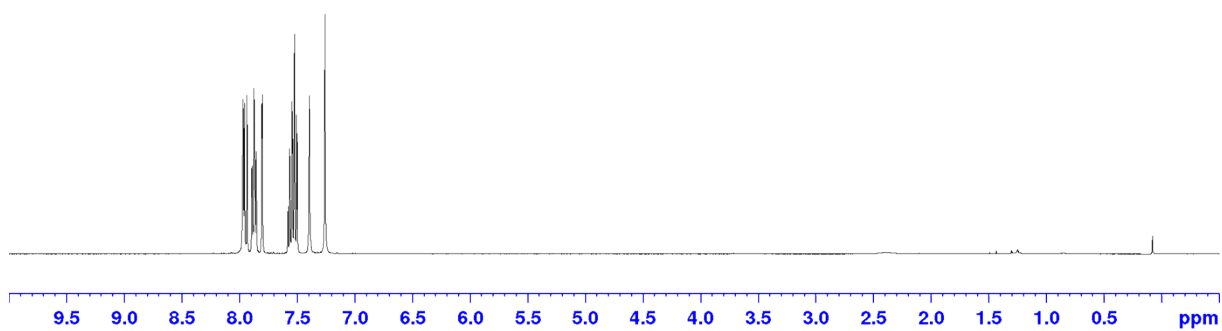

<sup>13</sup>C-NMR (100 MHz, CDCl<sub>3</sub>) chart of **3h**

135.79  
134.70  
133.74  
133.54  
130.54  
127.62  
127.35  
127.23  
120.19  
119.02  
118.37

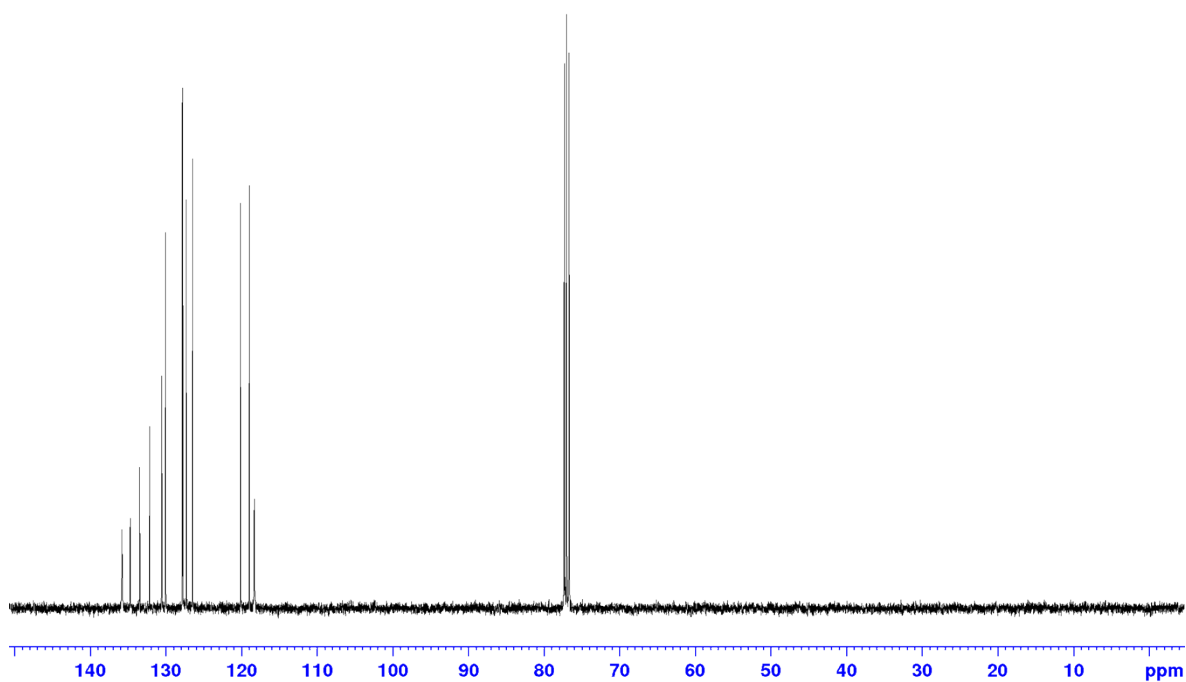

<sup>1</sup>H-NMR (400 MHz, CDCl<sub>3</sub>) chart of **3i**

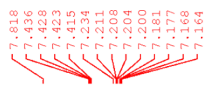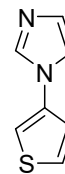

**3i**

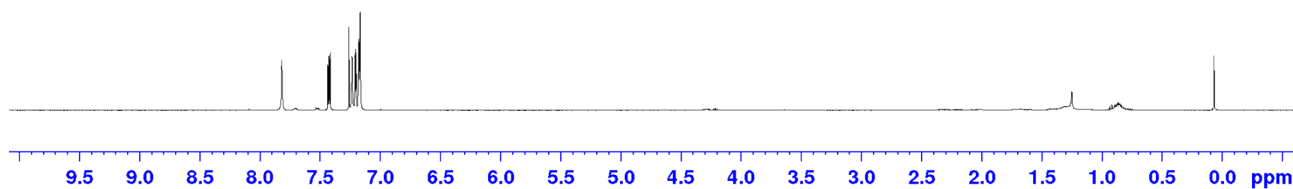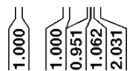

<sup>13</sup>C-NMR (100 MHz, CDCl<sub>3</sub>) chart of **3i**

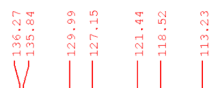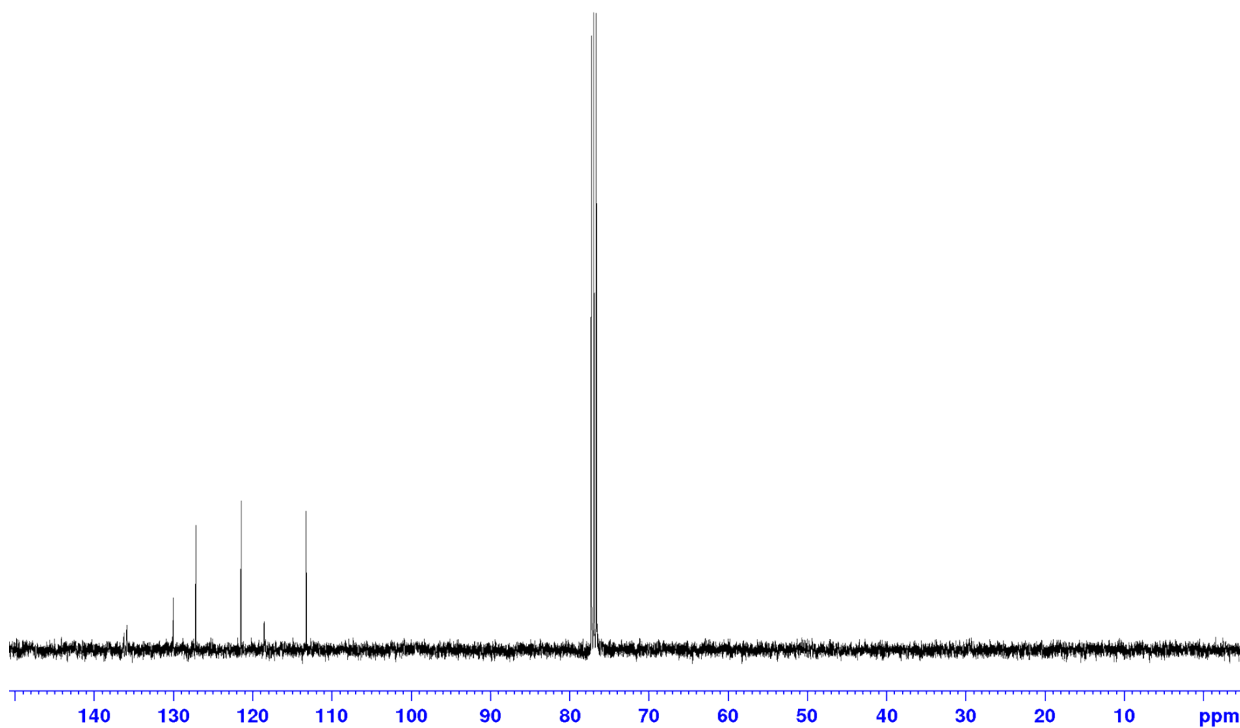

<sup>1</sup>H-NMR (400 MHz, CDCl<sub>3</sub>) chart of **3j**

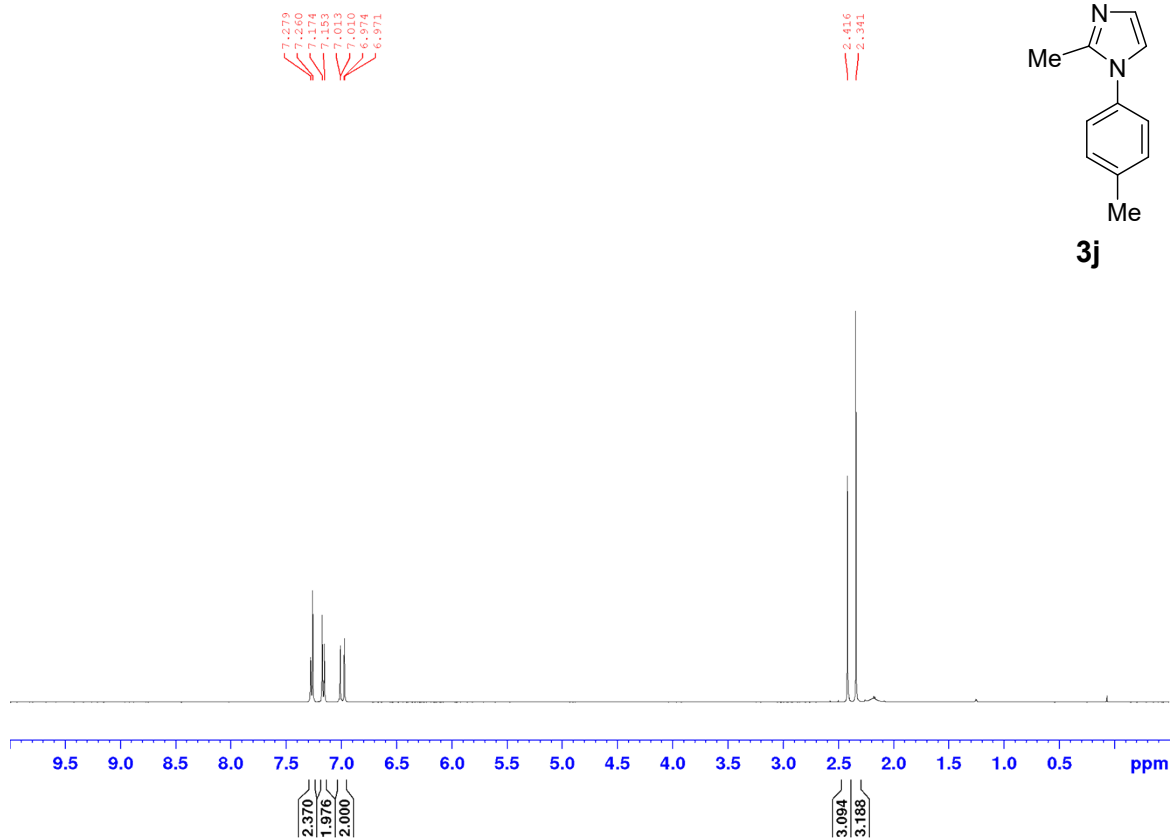

<sup>13</sup>C-NMR (100 MHz, CDCl<sub>3</sub>) chart of **3j**

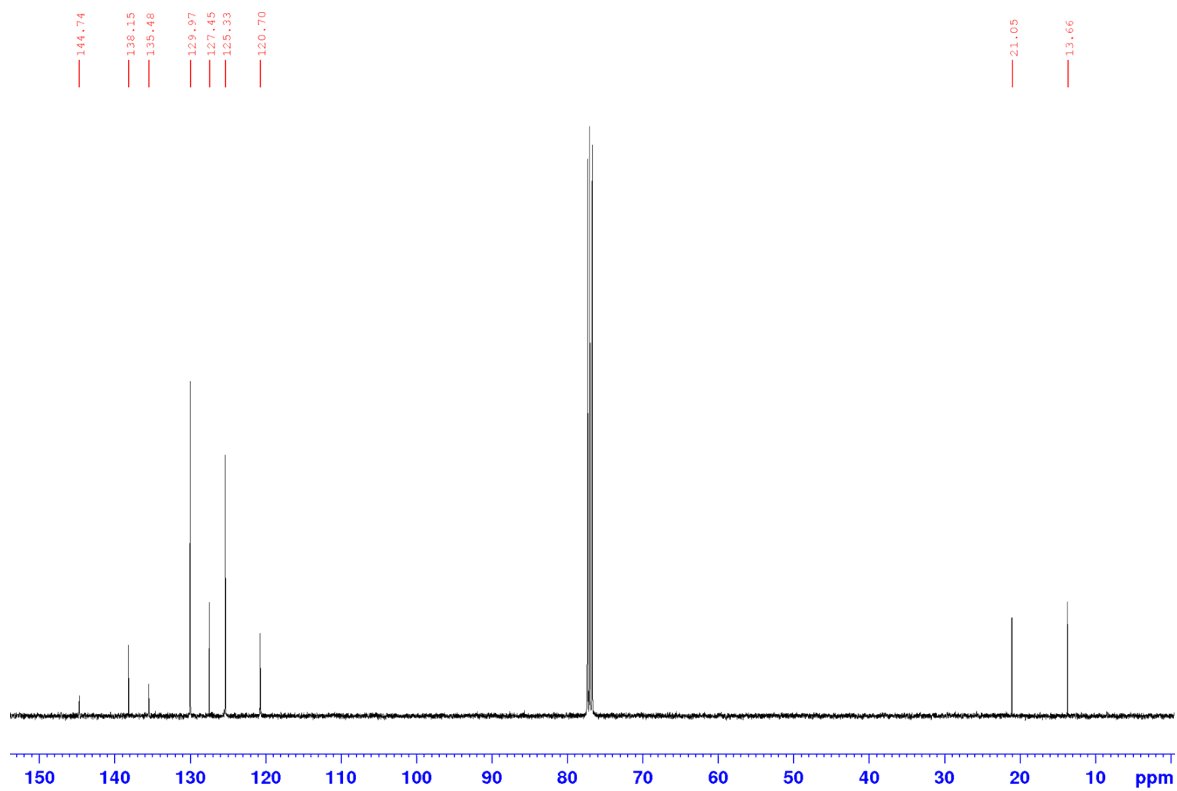

Supplement: d3cy00024a1.pdf [file d3cy00024a1.pdf]
